# Supplementary material for: Microwave induced one-pot conversion of d-glucose to 5-hydroxymethylfurfural by a novel sulfate-functionalized Sn-red mud catalyst
Source: Royal Society of Chemistry journal article supplement (doi:10.1039/d0se01476a), 2020-01-01
Supplement: d0se01476a1.pdf [file d0se01476a1.pdf]

## **Supplementary Information**

### **Microwave induced one-pot conversion of D-glucose to 5-hydroxymethylfurfural by a novel sulfate-functionalized Sn-red mud catalyst**

Bikashbindu Das, Kaustubha Mohanty\*

*Department of Chemical Engineering, Indian Institute of Technology Guwahati, Guwahati – 781039, India*

\*Corresponding author Email: [kmohanty@iitg.ac.in](mailto:kmohanty@iitg.ac.in); Tel: +91-361-2582267

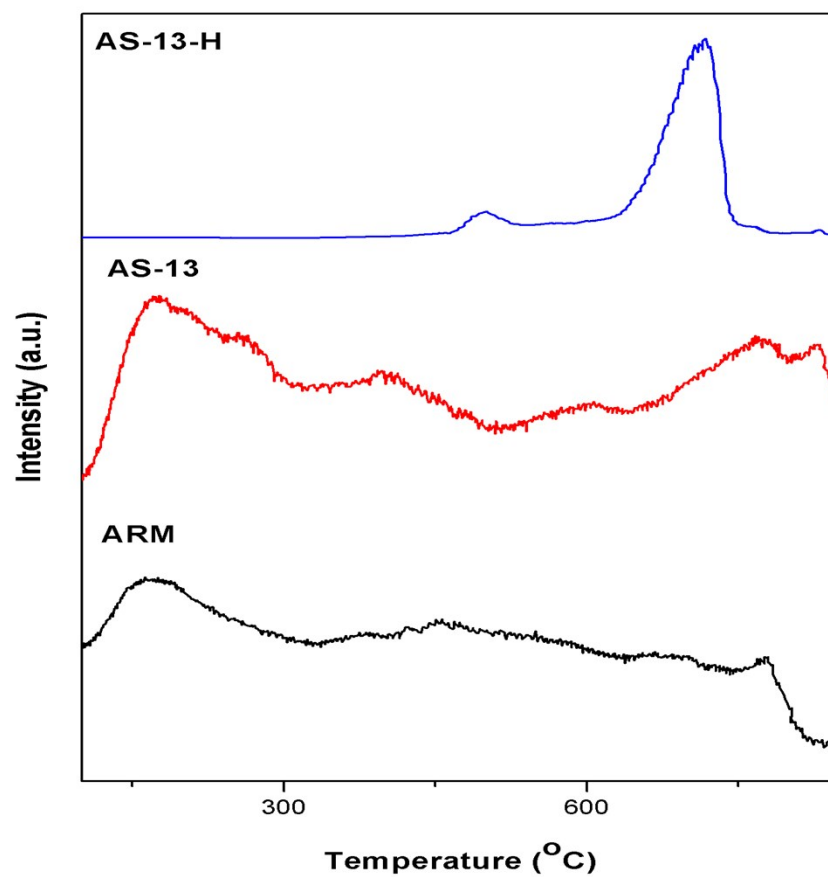

Figure S1. NH<sub>3</sub>-TPD analysis of various catalysts

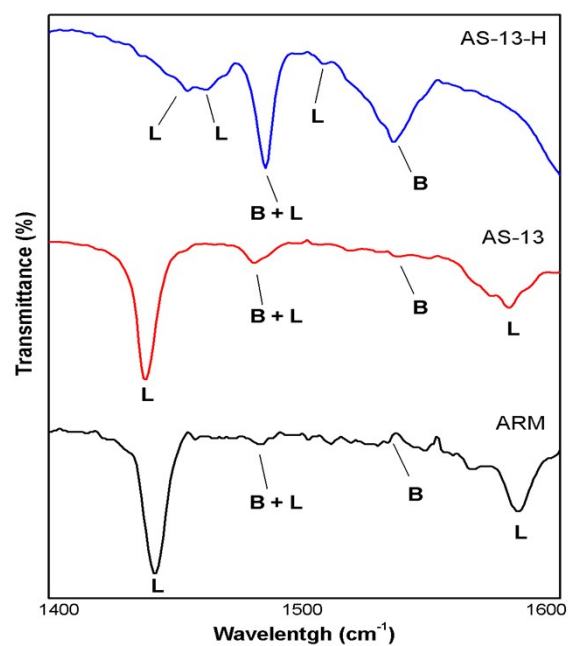

Figure S2. PY-ATR-FTIR spectra of various

Table S1: Bronsted to Lewis acid ratio of various catalysts

| Catalyst | Ratio of Bronsted to Lewis sites (B/L) |
|----------|----------------------------------------|
| ARM      | 0.088                                  |
| AS-13    | 0.112                                  |
| AS-13-H  | 1.472                                  |
